# Supplementary material
Source: publisher figshare collection journal article supplement (https://tandf.figshare.com/ndownloader/files/2408496)
Supplement: Supplementary file 1 [file 2408496]

## Investigation of the index case herd and identification of the strain types of *Theileria orientalis* associated with outbreaks of bovine anaemia in New Zealand in 2012

DJ Pulford\*<sup>§</sup>, AMJ McFadden\*, JS Hamilton<sup>†</sup>, J Donald<sup>‡</sup>

\* Investigation and Diagnostic Centre, Wallaceville, Ministry for Primary Industries, PO Box 40742, Upper Hutt 5018, New Zealand.

<sup>†</sup> School of Biological Sciences, Victoria University of Wellington, PO Box 600, Wellington 6140, New Zealand

<sup>‡</sup> New Zealand Veterinary Pathology, Cnr. Thackeray and Anglesea Streets, Hamilton, 3206, New Zealand

<sup>§</sup> Author for correspondence. Email: David.Pulford@mpi.govt.nz

**Supplementary Table 1. A nucleotide distance matrix of sequences obtained from major piroplasm surface protein (MPSP) PCR products amplified and sequenced from blood samples from cattle with signs of anaemia associated with *Theileria orientalis* infection (TABAs), against reference MPSP types described for Asia and Australasia (Ota *et al.* 2009; Kamau *et al.* 2011) after alignment with CLUSTAL W.**

| Reference Sequences        | MPSP PCR products from NZ samples |                            |                            |                            |                            |                            |                            |
|----------------------------|-----------------------------------|----------------------------|----------------------------|----------------------------|----------------------------|----------------------------|----------------------------|
|                            | Type 1 herd 6 <sup>a</sup>        | Type 3 herd 5 <sup>b</sup> | Type 2 herd 4 <sup>c</sup> | Type 5 herd 2 <sup>d</sup> | Type 2 herd 2 <sup>d</sup> | Type 2 herd 1 <sup>e</sup> | Type 3 Takaka <sup>f</sup> |
|                            | KP795977                          | KP795978                   | KP795979                   | KP795980                   | KP795981                   | KP795982                   | KP795983                   |
| Type 1 Chitose, Japan      | 98.4                              | 84.4                       | 87.2                       | 85.1                       | 87.2                       | 87.2                       | 84                         |
| Type 2 Ikeda, Japan        | 86.9                              | 82.1                       | 99.6                       | 80.8                       | 99.6                       | 99.6                       | 82.3                       |
| Type 3 Buffeli, Essex      | 84.8                              | 99.3                       | 82.3                       | 85.1                       | 82.3                       | 82.3                       | 99.1                       |
| Type 4 Okinawa, Japan      | 90.1                              | 90.6                       | 87.2                       | 87.7                       | 87.2                       | 87.2                       | 90.2                       |
| Type 5 Shintoku-Cheju      | 84.7                              | 86.3                       | 80.6                       | 97.3                       | 80.6                       | 80.6                       | 86                         |
| Type 6 Kamphaeng, Thailand | 77.5                              | 75.6                       | 77                         | 77.2                       | 77                         | 77                         | 75.8                       |
| Type 7 Okinawa, Japan      | 86.3                              | 81.2                       | 86.3                       | 80.1                       | 86.3                       | 86.3                       | 81                         |
| Clifton 41, Australia      | 85.1                              | 85.6                       | 80.8                       | 99.6                       | 80.8                       | 80.8                       | 85.3                       |
| Oakey 45, Australia        | 85.1                              | 85.6                       | 80.8                       | 99.6                       | 80.8                       | 80.8                       | 85.3                       |
| <i>Theileria parva</i>     | 63.8                              | 60.7                       | 64.2                       | 62.5                       | 64.2                       | 64.2                       | 61                         |
| <i>Theileria annulata</i>  | 64.2                              | 61.1                       | 63.1                       | 61.1                       | 63.1                       | 63.1                       | 60.9                       |

<sup>a</sup> Whangarei, Northland

<sup>b</sup> Helensville, Auckland

<sup>c</sup> Ekatahuna, Manawatu

<sup>d</sup> Reporoa, Waikato

<sup>e</sup> Kamo, Northland

<sup>f</sup> TABA-free herd in Takaka, South Island

**Ota N, Mizuno D, Kuboki N, Igarashi I, Nakamura Y, Yamashina H, Hanzaike T, Fujii K, Onoe S, Hata H *et al.*** Epidemiological survey of *Theileria orientalis* infection in grazing cattle in the eastern part of Hokkaido, Japan. *Journal of Veterinary Medical Science* 71, 937–44, 2009

**Kamau J, de Vos AJ, Playford M, Salim B, Kinyanjui P, Sugimoto C.** Emergence of new types of *Theileria orientalis* in Australian cattle and possible cause of theileriosis outbreaks. *Parasites and Vectors* 4, 22, 2011
